# Supplementary material for: Morphological evolution and spatial profile changes of poleward moving auroral forms
Source: Copernicus journal article supplement (doi:10.5194/angeo-41-115-2023), 2023-03-21
Supplement: Supplementary file [file angeo-41-115-2023-supplement-title-page.pdf › angeo-41-115-2023-supplement-title-page.pdf]

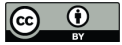

*Supplement of*

## **Morphological evolution and spatial profile changes of poleward moving auroral forms**

**Anton Goertz et al.**

*Correspondence to:* Anton Goertz (agoertz@lanl.gov)

- [angeo-41-115-2023-supplement-title-page.pdf](#)
- [Fig2\\_GIF.gif](#)
- [Fig3GIF\\_1.gif](#)
- [Fig3GIF\\_2.gif](#)

The copyright of individual parts of the supplement might differ from the article licence.
